# Supplementary material for: Self-assembly and photocatalytic property of germanoniobate [H6Ge4Nb16O56]10−: encapsulating four {GeO4} tetrahedra within a {Nb16} cage
Source: Royal Society of Chemistry journal article supplement (doi:10.1039/c3dt32855d), 2013-01-01
Supplement: c3dt32855d.pdf [file c3dt32855d.pdf]

## Supporting Information

### Self-Assembly and Photocatalytic Property of Germanoniobate [H<sub>6</sub>Ge<sub>4</sub>Nb<sub>16</sub>O<sub>56</sub>]<sup>10-</sup>: Encapsulating Four {GeO<sub>4</sub>} Tetrahedra within a {Nb<sub>16</sub>} Cage

Jian-Qiang Shen,<sup>a</sup> Shuang Yao,<sup>b</sup> Zhi-Ming Zhang,<sup>\*a</sup> Hai-Hong Wu,<sup>a</sup> Tian-Zhan Zhang,<sup>a</sup> and En-Bo Wang<sup>\*a</sup>

<sup>a</sup>Key laboratory of Polyoxometalate Science of Ministry of Education, Department of Chemistry, Northeast Normal University, Renmin Street No.5268, Changchun, Jilin, 130024, P. R. China;

<sup>b</sup>College of Chemistry and Environmental Engineering, Changchun University of Science and Technology, Changchun, Jilin 130022, (P. R. China)

E-mail: zhangzm178@nenu.edu.cn (Z. M. Zhang), wangeb889@nenu.edu.cn (E. B. Wang)

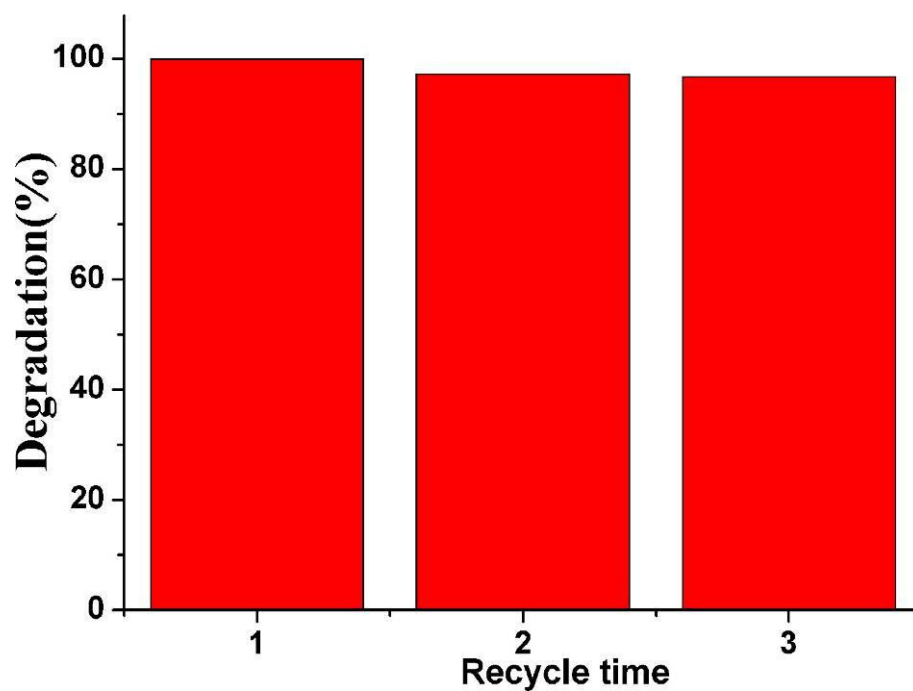

**Fig. S1.** Effect of recycle time on the decolorization rate of MB solution (pH = 11.20,  $C_{MB}$  = 15 mg/L,  $C_{cat}$  = 100 mg /L).

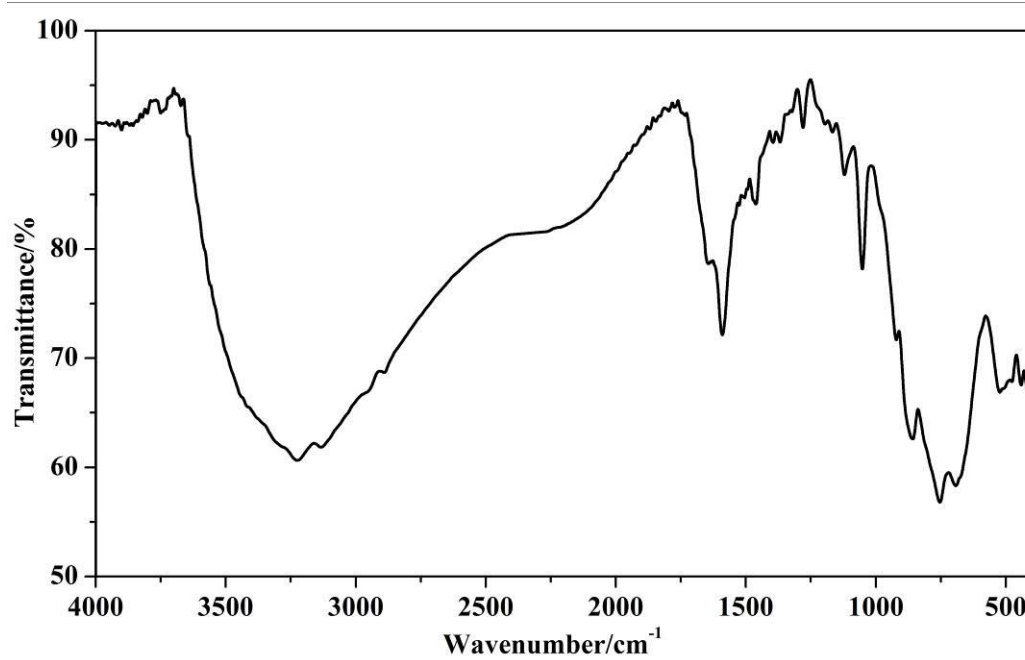

**Fig. S2.** The IR spectrum of **1**.

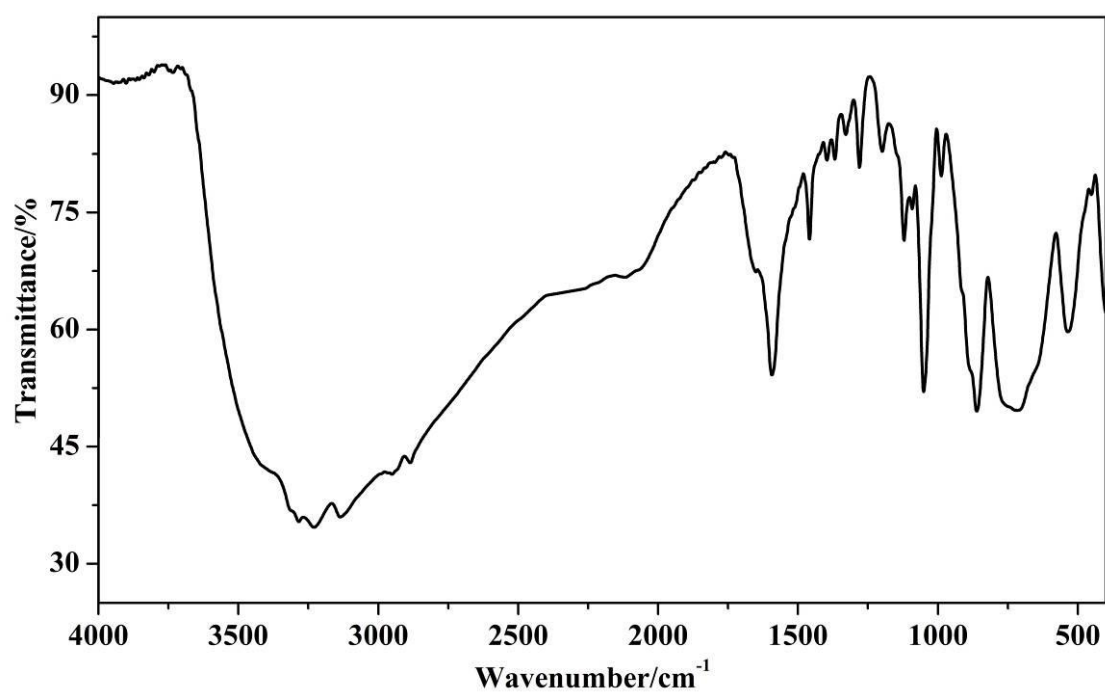

**Fig. S3.** The IR spectrum of **2**.

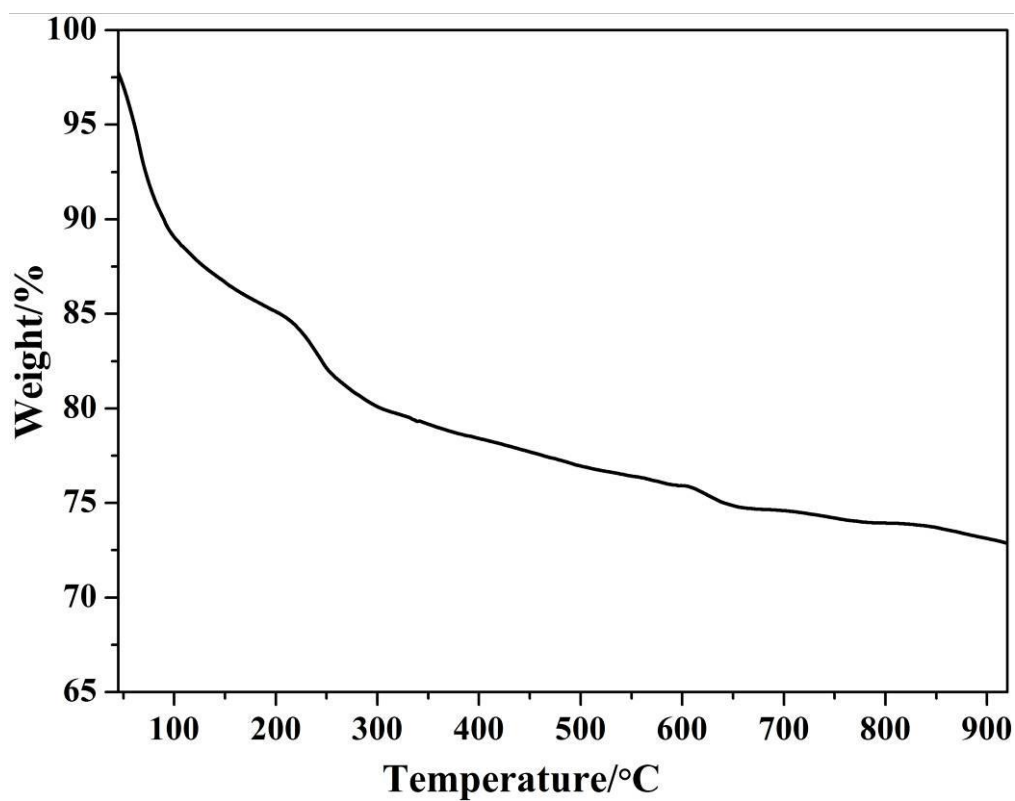

**Fig. S4.** The TG curve of **1**.
